## OBSERVATIONS

## Campaign for Diabetic Ketoacidosis Prevention Still Effective 8 Years Later

**D**iabetic ketoacidosis (DKA) in children with type 1 diabetes at onset is considered an increased risk factor of death and is generally related to a long duration of misdiagnosed hyperglycemia-associated symptoms (1). Shortening this latency period could be a winning preventive strategy. In the period of 1991–1997, we investigated this hypothesis in the province of Parma and demonstrated that, thanks to a school and physician campaign centered on the earliest symptom of diabetes (nocturnal enuresis in a “dry” child) as reported by 89% of parents, it was possible to prevent DKA (2). The key success of this campaign was due to a poster showing a child sleeping (potentially wetting the bed) as well as five attractive messages for parents: “Does your child drink and urinate more than usual? Has he started wetting the bed again? . . . Make sure he does not have high blood glucose levels. . . Call your Pe-

diatrician today. Children can also have diabetes.” Eight years after the publication of the results from this campaign, newly diagnosed type 1 diabetes from the same area was retrospectively investigated in order to verify whether the campaign was still effective.

From 1 January 1999 to 31 December 2006, 167 children with newly diagnosed type 1 diabetes were admitted to our department. Of these children, 32 (22 girls  $7.8 \pm 1.6$  years of age) were from the province of Parma, where a prevention program for DKA had been promoted (group 1) and 42 (19 girls  $8.2 \pm 1.4$  years of age) were from the two nearby provinces (group 2, control) in which no campaign had been performed. Moderate ( $\text{pH} < 7.2$ , bicarbonate  $< 10$  mmol/l) or severe ( $\text{pH} < 7.1$ , bicarbonate  $< 5$  mmol/l) DKA was found in 5 (15.6%) and 34 (80.9%;  $P < 0.002$ ) children in groups 1 and 2, respectively. The DKA episodes in group 1 were observed in 2004 ( $n = 1$ ), 2005 ( $n = 1$ ), and 2006 ( $n = 3$ ). No patients with DKA from group 1 were admitted in the period of 1999–2003. The duration of symptoms before diagnosis was  $4.5 \pm 3.5$  and  $16.0 \pm 8.0$  days ( $P < 0.0001$ ) in groups 1 and 2, respectively. Almost all parents from both groups reported an unusual enuresis in their children, but only the parents (81%) from group 1 promptly consulted a pediatrician following the messages displayed in the poster.

Today's data show that the campaign

for DKA prevention is still effective in Parma's province 8 years after it was promoted and confirm that enuresis is the most important warning symptom for the early diagnosis of type 1 diabetes. DKA episodes observed in the patients from group 1 in the period of 2004–2006 are a sign that the campaign should be periodically renewed (possibly every 5 years) in order to maintain effectiveness.

MAURIZIO VANELLI, MD  
GIOVANNI CHIARI, MD  
SILVIA LACAVA, MD  
BRUNELLA IOVANE, MD

From the Post-Graduate School of Paediatrics, University of Parma, Parma, Italy.

Address correspondence to Maurizio Vanelli, MD, Chairman, Post-Graduate School of Paediatrics, University Hospital of Parma, v.le A. Gramsci, 14, 43100 Parma, Italy. E-mail: maurizio.vanelli@unipr.it.

DOI: 10.2337/dc07-0059

© 2007 by the American Diabetes Association.

### References

1. Dunger MD, Sperling MA, Acerini CL, Bohn DJ, Daneman D, Glaser NS, Hanas R, Hintz RL, Levitsky LL, Savane MO, Tasker RC, Wolfsdorf JI: ESPE/LWPES consensus statement on diabetic ketoacidosis in children and adolescents. *Arch Dis Child* 89:188–194, 2004
2. Vanelli M, Chiari G, Ghizzoni L, Costi G, Giacalone T, Chiarelli F: Effectiveness of a prevention program for diabetic ketoacidosis in children. *Diabetes Care* 22:7–9, 1999
